# Supplementary material
Source: HighWire-hosted journal article supplement (https://bmjopen.bmj.com/content/12/7/e057387)
Supplement: inline-supplementary-material-1 [file inline-supplementary-material-1.pdf]

**Ovid MEDLINE**

1. exp Terminal Care/
2. Decision Making/
3. Decision Making, Shared/
4. exp Refusal to Treat/
5. Withholding Treatment/
6. Terminally Ill/
7. Palliative Care/
8. end of life.ti,ab,kf.
9. (end adj2 life).ti,ab,kf.
10. (end adj2 life care).ti,ab,kf.
11. EOL\*.ti,ab,kf.
12. EOL care.ti,ab,kf.
13. best interest\*.ti,ab,kf.
14. withdraw\*.ti,ab,kf.
15. withhold\*.ti,ab,kf.
16. decision\*.ti,ab,kf.
17. resol\*.ti,ab,kf.
18. consent.ti,ab,kf.
19. refusal\*.ti,ab,kf.
20. Intensive Care Units/
21. critical care\*.ti,ab,kf.
22. intensive care\*.ti,ab,kf.
23. adult ICU.ti,ab,kf.
24. AICU.ti,ab,kf.
25. ICU\*.ti,ab,kf.
26. "Dissent and Disputes"/
27. Negotiating/
28. Consensus/
29. conflict\*.ti,ab,kf.
30. dispute\*.ti,ab,kf.
31. disagreement\*.ti,ab,kf.
32. dissent\*.ti,ab,kf.
33. Physicians/
34. physician\*.ti,ab,kf.
35. doctor\*.ti,ab,kf.
36. nurse\*.ti,ab,kf.
37. healthcare professional\*.ti,ab,kf.
38. (health adj2 care professional).ti,ab,kf.
39. clinician\*.ti,ab,kf.
40. famil\*.ti,ab,kf.
41. relative\*.ti,ab,kf.
42. therap\*.ti,ab,kf.
43. surrogate\*.ti,ab,kf.
44. prox\*.ti,ab,kf.
45. patient\*.ti,ab,kf.
46. Qualitative Research/
47. qualitative.ti,ab,kf.
48. interview\*.ti,ab,kf.
49. focus group\*.ti,ab,kf.
50. survey\*.ti,ab,kf.
51. questionnaire\*.ti,ab,kf.
52. empirical\*.ti,ab,kf.
53. framework\*.ti,ab,kf.
54. 1 or 2 or 3 or 4 or 5 or 6 or 7 or 8 or 9 or 10 or 11 or 12 or 13 or 14 or 15 or 16 or 17 or 18 or 19
55. 20 or 21 or 22 or 23 or 24 or 25
56. 26 or 27 or 28 or 29 or 30 or 31 or 32
57. 33 or 34 or 35 or 36 or 37 or 38 or 39 or 40 or 41 or 42 or 43 or 44 or 45
58. 46 or 47 or 48 or 49 or 50 or 51 or 52 or 53
59. 54 and 55 and 56 and 57 and 58

**Ovid EMBASE**

1. exp Terminal Care/
2. Decision Making/
3. Decision Making, Shared/
4. exp Patient Abandonment/
5. Treatment Withdrawal/
6. Terminally Ill Patient/
7. Palliative Therapy/
8. end of life.ti,ab,kf.
9. (end adj2 life).ti,ab,kf.
10. (end adj2 life care).ti,ab,kf.
11. EOL\*.ti,ab,kf.
12. EOL care.ti,ab,kf.
13. best interest\*.ti,ab,kf.
14. withdraw\*.ti,ab,kf.
15. withhold\*.ti,ab,kf.
16. decision\*.ti,ab,kf.
17. resol\*.ti,ab,kf.
18. consent.ti,ab,kf.
19. refusal\*.ti,ab,kf.
20. Intensive Care Unit/
21. critical care\*.ti,ab,kf.
22. intensive care\*.ti,ab,kf.
23. adult ICU.ti,ab,kf.
24. AICU.ti,ab,kf.
25. ICU\*.ti,ab,kf.
26. Conflict/
27. Negotiation/
28. Consensus/
29. conflict\*.ti,ab,kf.
30. dispute\*.ti,ab,kf.
31. disagreement\*.ti,ab,kf.
32. dissent\*.ti,ab,kf.
33. Physician/
34. physician\*.ti,ab,kf.
35. doctor\*.ti,ab,kf.
36. nurse\*.ti,ab,kf.
37. healthcare professional\*.ti,ab,kf.
38. (health adj2 care professional).ti,ab,kf.
39. clinician\*.ti,ab,kf.
40. famil\*.ti,ab,kf.
41. relative\*.ti,ab,kf.
42. therap\*.ti,ab,kf.
43. surrogate\*.ti,ab,kf.
44. prox\*.ti,ab,kf.
45. patient\*.ti,ab,kf.
46. Qualitative Research/
47. qualitative.ti,ab,kf.
48. interview\*.ti,ab,kf.
49. focus group\*.ti,ab,kf.
50. survey\*.ti,ab,kf.
51. questionnaire\*.ti,ab,kf.
52. empirical\*.ti,ab,kf.
53. framework\*.ti,ab,kf.
54. 1 or 2 or 3 or 4 or 5 or 6 or 7 or 8 or 9 or 10 or 11 or 12 or 13 or 14 or 15 or 16 or 17 or 18 or 19
55. 20 or 21 or 22 or 23 or 24 or 25
56. 26 or 27 or 28 or 29 or 30 or 31 or 32
57. 33 or 34 or 35 or 36 or 37 or 38 or 39 or 40 or 41 or 42 or 43 or 44 or 45
58. 46 or 47 or 48 or 49 or 50 or 51 or 52 or 53
59. 54 and 55 and 56 and 57 and 58

**Ovid PsycINFO**

1. Decision Making/
2. exp Treatment Refusal/
3. Treatment Withholding/
4. Treatment Termination/
5. Terminally Ill Patients/
6. Palliative Care/
7. end of life.tw.
8. (end adj2 life).tw.
9. (end adj2 life care).tw.
10. EOL\*.tw.
11. EOL care.tw.
12. best interest\*.tw.
13. withdraw\*.tw.
14. withhold\*.tw.
15. decision\*.tw.
16. resol\*.tw.
17. consent.tw.
18. refusal\*.tw.
19. Intensive Care/
20. critical care\*.tw.
21. intensive care\*.tw.
22. adult ICU.tw.
23. AICU.tw.
24. ICU\*.tw.
25. Conflict/
26. Conflict Resolution/
27. Negotiation/
28. conflict\*.tw.
29. dispute\*.tw.
30. disagreement\*.tw.
31. dissent\*.tw.
32. Physicians/
33. physician\*.tw.
34. doctor\*.tw.
35. nurse\*.tw.
36. healthcare professional\*.tw.
37. (health adj2 care professional).tw.
38. clinician\*.tw.
39. famil\*.tw.
40. relative\*.tw.
41. therap\*.tw.
42. surrogate\*.tw.
43. prox\*.tw.
44. patient\*.tw.
45. Qualitative Methods/
46. qualitative.tw.
47. interview\*.tw.
48. focus group\*.tw.
49. survey\*.tw.
50. questionnaire\*.tw.
51. empirical\*.tw.
52. framework\*.tw.
53. 1 or 2 or 3 or 4 or 5 or 6 or 7 or 8 or 9 or 10 or 11 or 12 or 13 or 14 or 15 or 16 or 17 or 18
54. 19 or 20 or 21 or 22 or 23 or 24
55. 25 or 26 or 27 or 28 or 29 or 30 or 31
56. 32 or 33 or 34 or 35 or 36 or 37 or 38 or 39 or 40 or 41 or 42 or 43 or 44
57. 45 or 46 or 47 or 48 or 49 or 50 or 51 or 52
58. 53 and 54 and 55 and 56 and 57

**Web of Science**

((((TS=(terminal care OR decision\$making OR end NEAR/2 life OR end NEAR/2 life care OR palliative care OR terminal\* ill\* OR best interest\* OR withdraw\* OR withhold\* OR decision\* OR resol\* OR consent OR refusal\* OR EOL\* OR EOL care))

AND TS=(dissent\* OR dispute\* OR conflict\* OR disagreement\* OR negotiat\* OR consensus))

AND TS=(physician\* OR doctor\* OR nurse\* OR health\$care professional\* OR clinician\* OR famil\* OR relative\* OR therap\* OR surrogate\* OR prox\* OR patient\*))

AND TS=(intensive care\* OR critical care\* OR adult ICU\* OR ICU\* OR AICU))

AND TS=(qualitative\* OR interview\* OR focus group\* OR survey\* OR questionnaire\* OR empirical\* OR framework\*)

**Scopus**

(TITLE-ABS-KEY(terminal care) OR TITLE-ABS-KEY(decision making) OR TITLE-ABS-KEY(end W/2 life) OR TITLE-ABS-KEY(end W/2 life care) OR TITLE-ABS-KEY(palliative care) OR TITLE-ABS-KEY(terminal\* ill\*) OR TITLE-ABS-KEY(best interest\*) OR TITLE-ABS-KEY(withdraw\*) OR TITLE-ABS-KEY(withhold\*) OR TITLE-ABS-KEY(decision\*) OR TITLE-ABS-KEY(resol\*) OR TITLE-ABS-KEY(consent) OR TITLE-ABS-KEY(refusal\*) OR TITLE-ABS-KEY(EOL\*) OR TITLE-ABS-KEY(EOL care))

AND (TITLE-ABS-KEY(intensive care\*) OR TITLE-ABS-KEY(critical care\*) OR TITLE-ABS-KEY(adult ICU\*) OR TITLE-ABS-KEY(ICU\*) OR TITLE-ABS-KEY(AICU))

AND (TITLE-ABS-KEY(dissent\*) OR TITLE-ABS-KEY(dispute\*) OR TITLE-ABS-KEY(conflict\*) OR TITLE-ABS-KEY(disagreement\*) OR TITLE-ABS-KEY(consensus\*) OR TITLE-ABS-KEY(negotiat\*))

AND (TITLE-ABS-KEY(physician\*) OR TITLE-ABS-KEY(doctor\*) OR TITLE-ABS-KEY(nurse\*) OR TITLE-ABS-KEY(healthcare professional\*) OR TITLE-ABS-KEY(health care professional\*) OR TITLE-ABS-KEY(clinician\*) OR TITLE-ABS-KEY(famil\*) OR TITLE-ABS-KEY(relative\*) OR TITLE-ABS-KEY(therap\*) OR TITLE-ABS-KEY(surrogate\*) OR TITLE-ABS-KEY(prox\*) OR TITLE-ABS-KEY(patient\*))

AND (TITLE-ABS-KEY(qualitative\*) OR TITLE-ABS-KEY(interview\*) OR TITLE-ABS-KEY(focus group\*) OR TITLE-ABS-KEY(survey\*) OR TITLE-ABS-KEY(questionnaire\*) OR TITLE-ABS-KEY(empirical\*) OR TITLE-ABS-KEY(framework\*))

**CINAHL**

(MH "Terminal Care+" OR MH "Decision Making+" OR MH "Refusal to Treat+" OR MH "Treatment Refusal+" OR MH "Euthanasia, Passive" OR MH "Terminally II Patients" OR MH "Palliative Care" OR TI ("end of life" OR "end W2 life" OR "end W2 life care" OR "EOL\*" OR "EOL care" OR "best interest\*" OR "withdraw\*" OR "withhold\*" OR "decision\*" OR "resol\*" OR "consent" OR "refusal\*") OR AB ("end of life" OR "end W2 life" OR "end W2 life care" OR "EOL\*" OR "EOL care" OR "best interest\*" OR "withdraw\*" OR "withhold\*" OR "decision\*" OR "resol\*" OR "consent" OR "refusal\*"))

AND (MH "Critical Care" OR TI ("critical care\*" OR "intensive care\*" OR "adult ICU" OR "AICU" OR "ICU\*") OR AB ("critical care\*" OR "intensive care\*" OR "adult ICU" OR "AICU" OR "ICU\*"))

AND (MH "Conflict Management" OR MH "Negotiation" OR MH "Consensus" OR TI ("conflict\*" OR "dispute\*" OR "disagreement\*" OR "dissent\*") OR AB ("conflict\*" OR "dispute\*" OR "disagreement\*" OR "dissent\*"))

AND (MH "Physicians+" OR TI ("physician\*" OR "doctor\*" OR "nurse\*" OR "healthcare professional\*" OR "health W2 care professional" OR "clinician\*" OR "famil\*" OR "relative\*" OR "therap\*" OR "surrogate\*" OR "prox\*" OR "patient\*") OR AB ("physician\*" OR "doctor\*" OR "nurse\*" OR "healthcare professional\*" OR "health W2 care professional" OR "clinician\*" OR "famil\*" OR "relative\*" OR "therap\*" OR "surrogate\*" OR "prox\*" OR "patient\*"))

AND (MH "Qualitative Studies" OR TI ("qualitative" OR "interview\*" OR "focus group\*" OR "survey\*" OR "questionnaire\*" OR "empirical\*" OR "framework\*") OR AB ("qualitative" OR "interview\*" OR "focus group\*" OR "survey\*" OR "questionnaire\*" OR "empirical\*" OR "framework\*"))

**Project MUSE**

(terminal\* OR decision\* OR making OR end OR life OR care OR palliative OR ill\* OR best interest\* OR withdraw\* OR withhold\* OR resol\* OR consent OR refusal\* OR EOL\*)

AND (dissent\* OR dispute\* OR conflict\* OR disagreement\* OR negotiat\* OR consensus)

AND (physician\* OR doctor\* OR nurse\* OR health\* OR professional\* OR clinician\* OR famil\* OR relative\* OR therap\* OR surrogate\* OR prox\* OR patient\*)

AND (intensive OR critical OR care OR unit\* OR adult\* OR ICU\* OR AICU)

AND (qualitative\* OR interview\* OR "focus group\*" OR survey\* OR questionnaire\* OR empirical\* OR framework\*)

**LILACS**

("Terminal Care/" OR "Decision Making/" OR "Refusal to Treat/" OR "Withholding Treatment/" OR "Terminally Ill/" OR "Palliative Care/" OR terminal\$ OR decision\$ OR making OR end OR life OR care OR palliative OR ill\$ OR best interest\$ OR withdraw\$ OR withhold\$ OR resol\$ OR consent OR refusal\$ OR EOL\$) AND ("Conflict Resolution/" OR "Conflict/" OR dissent\$ OR dispute\$ OR conflict\$ OR disagreement\$ OR negotiat\$ OR consensus) AND ("Physician/" OR physician\$ OR doctor\$ OR nurse\$ OR health\$ OR professional\$ OR clinician\$ OR famil\$ OR relative\$ OR therap\$ OR surrogate\$ OR prox\$ OR patient\$) AND ("Intensive Care/" OR "Intensive Care Unit/" OR intensive OR critical OR care OR unit\$ OR adult\$ OR ICU\$ OR AICU) AND ("Qualitative/" OR qualitative\$ OR interview\$ OR focus OR group\$ OR survey\$ OR questionnaire\$ OR empirical\$ OR framework\$) [Subject descriptor]

OR ("Terminal Care/" OR "Decision Making/" OR "Refusal to Treat/" OR "Withholding Treatment/" OR "Terminally Ill/" OR "Palliative Care/" OR terminal\$ OR decision\$ OR making OR end OR life OR care OR palliative OR ill\$ OR best interest\$ OR withdraw\$ OR withhold\$ OR resol\$ OR consent OR refusal\$ OR EOL\$) AND ("Conflict Resolution/" OR "Conflict/" OR dissent\$ OR dispute\$ OR conflict\$ OR disagreement\$ OR negotiat\$ OR consensus) AND ("Physician/" OR physician\$ OR doctor\$ OR nurse\$ OR health\$ OR professional\$ OR clinician\$ OR famil\$ OR relative\$ OR therap\$ OR surrogate\$ OR prox\$ OR patient\$) AND ("Intensive Care/" OR "Intensive Care Unit/" OR intensive OR critical OR care OR unit\$ OR adult\$ OR ICU\$ OR AICU) AND ("Qualitative/" OR qualitative\$ OR interview\$ OR focus OR group\$ OR survey\$ OR questionnaire\$ OR empirical\$ OR framework\$) [Title words]
